# Supplementary material for: Single-cell RNA-seq of human induced pluripotent stem cells reveals cellular heterogeneity and cell state transitions between subpopulations
Source: HighWire-hosted journal article supplement (doi:10.1101/gr.223925.117), 2018-05-11
Supplement: Supplemental_Figure_Table_Legends.docx [file Supplemental_Figure_Table_Legends.docx]

**Supplemental Figures**

**Supplemental Figure S1.** WTC-CRISPRi hiPSC cell line used in this study. (a) WTC CRISPRi engineered cell line carries a fusion dCas9-KRAB protein, which is inducible by doxycycline. KRAB is a repression domain that inhibits transcription of a downstream gene. (b) Chromosome g-banding karyotype analysis of WTC-CRISPRi hiPSCs at metaphase (n=30) is shown. Banding level is 450-500. Normal male karyotype was observed.

**Supplemental Figure S2.** Quality control and comparisons of transcriptional features between five biological replicates. (a) Numbers of mapped reads and total genes per cell for five samples are shown. Symbols S1, S2, S3, S4, and S5 denote sample 1, sample 2, sample 3, sample 4 and sample 5 respectively. (b) Most cells had lower than 10% of total reads mapped to mitochondrial. (c) Most cells had lower than 40% reads mapped to ribosomal genes. (d) The gene expression spanned six order of magnitude and number of genes detected per cell ranged from fewer than 1,000 to above 20,000 genes. (e) The top 30 genes (after removing ribosomal and mitochondrial genes) contributed to over 13% of variance among cells. (f) Summary sequencing statistics for five samples is shown for six parameters. The five samples differed in the number of cells and mapped reads per cell, but were similar in number of genes and total reads per cell (except for sample 2).

**Supplemental Figure S3.** Cell distribution by batches and subpopulations on two-dimensional t-SNE plots (a) Scatter plot with each point representing one cell is shown. Normalized data was used for t-SNE transformation into two dimensions. Cells are colored by subpopulation labels from one to four. The two-dimensional view is consistent to the three-dimensional view shown in Figure 1a. (b) Cells are colored by samples from sample one to sample five. Comparing overlapped distribution between the two plots shows the distribution of samples to subpopulations.

**Supplemental Figure S4.** Stability analysis for the second clustering stage by dynamicTreeCut. Prior to dynamicTreeCut (Langfelder et al., 2008), an original dendrogram tree was constructed by an unsupervised agglomerative hierarchical clustering approach based on cell-to-cell Euclidian distance of main principal components. The main clustering results of the tree were derived from applying dynamicTreeCut for the whole tree (5th quartile from root, with the minimum joining height, to the top with the maximum joining height. The results are shown by the branch colors in the dendrogram tree. To assess the stability, the dynamicTreeCut was applied for 10 independent clustering runs, each of which uses a smaller search space from root to the top, starting with 2.5% reduction in the search area up to 25%. The percent values shown at the bottom panel are the area from bottom to the top of the tree to be excluded from the search space. Outside the search area, branches are merged by a sharp threshold. In all cases, the clustering results, with 4 clusters, are consistently identified.

**Supplemental Figure S5.** Network analysis of 49 differentially expressed genes between subpopulations one and two. Reactome pathway enrichment analysis was applied for 49 DE genes. The enriched Reactome pathway is ‘transcriptional regulation of pluripotent stem cells’, and its highly enriched child-pathway ‘POU5F1 (OCT4), SOX2, NANOG activate genes related to proliferation’. Purple denotes effects of the SALL4 gene. Lines with an arrow indicate activation and non-arrowed lines indicate suppression. Protein Complex 1 - SALL4:SALL4; Protein Complex 2 - POU5F1:STAT3; Protein Complex 3 – POU5F1:SOX2:NANOG:ZSCAN10:PRDM14:SMAD2:SALL4:POU5F1; Protein Complex 4 - SMAD4:p-SMAD2:p-SMAD2; Protein Complex 5 – POU5F1:SOX2:NANOG:KLF4:

PBX1:SMAD2:NANOG.

**Supplemental Figure S6.** ZIC1 and SALL4 as potential candidate genes distinguishing subpopulation two from one. Panels A and B show two candidate genes (SALL4 (a) and ZIC1 (b)) involved in maintaining pluripotency and cell proliferation. Edges connect the two genes to predicted interaction protein partners, based on information from the STRING database. C. GeneMANIA program in Cytoscape was used to predict possible interactions between the 30 LASSO-selected genes from the 49 DE genes. Genes displayed in black nodes are genes within the list, while genes in grey nodes are highly related genes not present in the list but were predicted from the background interaction database. Different colors of the edges represent different types of interaction. The ZIC1 and SALL4 genes are highlighted in yellow.

**Supplemental Figure S7.** Selection of significant gene predictors for classifying each subpopulation using LASSO regression. For each subpopulation, a LASSO model was run using a set of differentially expressed genes and another set of known markers (Supplemental Table S7). Each panel shows the results of a single primary subpopulation compared to the remaining subpopulations: (a) Subpopulation one vs two, three and four. (b) Subpopulation two vs one, three and four. (c) Subpopulation three vs one, two and four. (d) Subpopulation four vs one, two and three. For the misclassification plot: the error was calculated based on 10-fold cross validation procedure, and the red points represent the mean misclassification values; the vertical dashed lines show the optimal range of the number of genes to be included into the model to achieve the lowest misclassification error. For the coefficient-deviance plot: a gene with a coefficient equal 0 indicates the nonsignificant contribution to the classification of the subpopulation; and the primary x-axis shows the deviance explained by a set of gene predictors; the secondary x-axis (on the top of the plot) shows the number of genes, ranging from 1 to the maximum number of DE genes or of known markers.

**Supplemental Figure S8.** Confirming expression of LASSO selected genes in 71 HipSci hiPSC lines. mRNA-Seq data for 71 induced pluripotent cell lines (iPSCs) was obtained from the HipSci database. Expression of LASSO-selected genes (i.e. genes that differentiate each subpopulation) is shown for the 18,787 single cells (violin plot; panels a, b, c, and d). Panels e, f, g and h show expression of the selected genes from the bulk RNA-Seq data used in HipSci for 71 iPSCs, in comparisons to the expression in the single cell data reported in this paper. A correlation coefficient was calculated for each of the HipSci/single cell comparison using the mean expression per gene in each data set. Violin plots for panel b and d show the results of 10 randomly selected genes (from 86 genes and 57 genes respectively).

**Supplemental Figure S9.** Heterogeneity of expression between genes across single cell populations. (a) Coefficient of variation (calculated by the ratio of standard deviation/mean) across the whole population and across subpopulations. (b) Distribution of biological dispersion (calculated based on negative binomial distribution of gene expression by Cox-Reid likelihood profiling) for each gene (shown as black points, labeled as Tagwise dispersion) relative to the common dispersion (the grand median value - median dispersion of all genes at all expression levels in all cells, shown as red line) and to the trended dispersion (dispersion of genes with different expression value, shown as blue line). Comparing redlines between plots suggests differences in expression heterogeneity between subpopulations. Comparing tagwise dispersion or trended dispersion within a plot show levels of heterogeneity of gene expression across all cells in a subpopulation.

**Supplemental Tables**

**Supplemental Table S1.** Summary statistics for sequencing and mapping data of five samples

**Supplemental Table S2.** Summary of the cell and gene filtering process

**Supplemental Table S3.** Total number of unique genes detected in each sample

**Supplemental Table S4.** Total genes detected in 545 randomly selected cells from 100 bootstrap iterations

**Supplemental Table S5.** Cell number distribution across subpopulations

**Supplemental Table S6.** Number of overexpressed genes between subpopulations nij

**Supplemental Table S7.** Expression of known pluripotent and lineage-primed markers

**Supplemental Table S8.** Number of cells expressing known pluripotent and lineage-primed markers across subpopulations

**Supplemental Table S9.** Functional enrichment analysis of differentially expressed (DE) genes for cells in subpopulation one compared to cells in the remaining subpopulations

**Supplemental Table S10.** Functional enrichment analysis of DE genes for cells in subpopulation two compared to cells in the remaining subpopulations

**Supplemental Table S11.** Functional enrichment analysis of DE genes, which distinguish subpopulation one from two

**Supplemental Table S12.** Pathway analysis of DE genes for cells in subpopulation three

**Supplemental Table S13.** Functional enrichment analysis of DE genes in subpopulation four

**Supplemental Table S14.** Expression (counts per million) of genes in the enriched Reactome pathway: ‘Transcriptional regulation of pluripotent stem cell’

**Supplemental Table S15.** Optimal number of gene predictors selected by LASSO Regression.

**Supplemental Table S16.** Lists of all LASSO selected genes in Supplemental Table S15.
