# Supplementary material for: Single-cell RNA-seq of human induced pluripotent stem cells reveals cellular heterogeneity and cell state transitions between subpopulations
Source: HighWire-hosted journal article supplement (doi:10.1101/gr.223925.117), 2018-05-11
Supplement: Supplemental_Table_S3.docx [file Supplemental_Table_S3.docx]

**Supplemental Table S3.** Total number of unique genes detected in each sample

| Total genes | Sample 1 | Sample 2 | Sample 3 | Sample 4 | Sample 5 |
| --- | --- | --- | --- | --- | --- |
| Sample 1* | **20,356** | 2,431 | 1,991 | 881 | 1,344 |
| Sample 2 | 641 | **18,557** | 1,091 | 410 | 699 |
| Sample 3 | 905 | 1,795 | **19,261** | 555 | 869 |
| Sample 4 | 2,025 | 3,344 | 2,785 | **21,491** | 2,007 |
| Sample 5 | 1,232 | 2,377 | 1,843 | 751 | **20,235** |

*The number of unique genes for the samples in rows compared to samples in columns. The bold values indicate the total number of unique genes for that sample.
