# Supplementary material for: Single-cell RNA-seq of human induced pluripotent stem cells reveals cellular heterogeneity and cell state transitions between subpopulations
Source: HighWire-hosted journal article supplement (doi:10.1101/gr.223925.117), 2018-05-11
Supplement: Supplemental_Table_S4.docx [file Supplemental_Table_S4.docx]

**Supplemental Table S4.** Total genes detected in 545 randomly selected cells from 100 bootstrap iterations

| Total genes | Sample 1 | Sample 2 | Sample 3 | Sample 4 | Sample 5 |
| --- | --- | --- | --- | --- | --- |
| *Original total genes* | *20,356* | *18,557* | *19,261* | *21,491* | *20,235* |
| *Original total cells* | *2,779* | *545* | *3,103* | *9,192* | *4,863* |
| *Original mean rpc* | *71,256* | *318,909* | *56,459* | *38,637* | *26,471* |
| Median genes of subsample* | 17,446 | 18,557 | 16,339 | 16,516 | 16,490 |
| Mean genes of subsample | 17,444 | 18,557 | 16,347 | 16,517 | 16,488 |
| Std. Dev. of subsample | 52.4 | 0 | 55.2 | 63.9 | 39.9 |

*The median, mean and standard deviation were calculated from 100 bootstraps
