# Supplementary material for: Single-cell RNA-seq of human induced pluripotent stem cells reveals cellular heterogeneity and cell state transitions between subpopulations
Source: HighWire-hosted journal article supplement (doi:10.1101/gr.223925.117), 2018-05-11
Supplement: Supplemental_Table_S5.docx [file Supplemental_Table_S5.docx]

**Supplemental Table S5.** Cell number distribution across subpopulations a

|  | Subpopulation 1 | Subpopulation 2 | Subpopulation 3 | Subpopulation 4 | Total |
| --- | --- | --- | --- | --- | --- |
| Sample 1 | 1,118 (46.1) | 1,306 (53.8) | 2 (0.1) | 0 (0) | 2,426 |
| Sample 2 | 215 (50.7) | 203 (47.9) | 4 (0.9) | 2 (0.5) | 424 |
| Sample 3 | 1,410 (48.5) | 1,024 (35.2) | 294 (10.1) | 178 (6.1) | 2,906 |
| Sample 4 | 4,095 (49.4) | 3,975 (47.9) | 211 (2.5) | 13 (0.2) | 8,294 |
| Sample 5 | 2,245 (47.4) | 2,469 (52.1) | 15 (0.3) | 8 (0.2) | 4,737 |
| Total | **9,083 (48.3)** | **8,977 (47.8)** | **526 (2.8)** | **201 (1.1)** | **18,787** |

aNumbers in brackets are the percentages of cells in each subpopulation within each sample.
