# Supplementary material for: Single-cell RNA-seq of human induced pluripotent stem cells reveals cellular heterogeneity and cell state transitions between subpopulations
Source: HighWire-hosted journal article supplement (doi:10.1101/gr.223925.117), 2018-05-11
Supplement: Supplemental_Table_S6.docx [file Supplemental_Table_S6.docx]

**Supplemental Table S6.** Number of overexpressed genes between subpopulations nija

|  | Subpopulation 1 | Subpopulation 2 | Subpopulation 3 | Subpopulation 4 |
| --- | --- | --- | --- | --- |
| Cluster 1 | 0 | 16 | 651 | 2,366 |
| Cluster 2 | 33 | 0 | 546 | 2,433 |
| Cluster 3 | 90 | 27 | 0 | 2,093 |
| Cluster 4 | 111 | 80 | 441 | 0 |

anij is the number of genes higher in subpopulation in row i compared to subpopulation in column j.
