# Supplementary material for: Single-cell RNA-seq of human induced pluripotent stem cells reveals cellular heterogeneity and cell state transitions between subpopulations
Source: HighWire-hosted journal article supplement (doi:10.1101/gr.223925.117), 2018-05-11
Supplement: Supplemental_Table_S7.docx [file Supplemental_Table_S7.docx]

**Supplemental Table S7.** Expression of known pluripotent and lineage-primed markers

| Known Markersa | Average Expression in Each Subpopulation | | | |
| --- | --- | --- | --- | --- |
| **Subpopulation 1** | **Subpopulation 2** | **Subpopulation 3** | **Subpopulation 4** |
| *POU5F1* | 1845.07b | 1933.63 | 1446.8 | 1258.13 |
| *DNMT3B* | 302.71 | 342.87 | 182.57 | 174.65 |
| *SOX2* | 280.83 | 299.64 | 235.07 | 219.07 |
| *NODAL* | 210.43 | 211.83 | 129.12 | 36.06 |
| *UTF1* | 178.16 | 201.13 | 64.28 | 44.08 |
| *LIN28A* | 169.93 | 189.92 | 111.54 | 113.18 |
| *LEFTY1* | 160.57 | 168.91 | 102.02 | 18.58 |
| *GDF3* | 98.25 | 85.41 | 68.12 | 23.07 |
| *SDC2* | 87.92 | 80.54 | 64.37 | 53.14 |
| *NANOG* | 42.48 | 46.83 | 25.09 | 22.94 |
| *LIN28B* | 38.2 | 42.88 | 27.31 | 11.72 |
| *HESX1* | 34.19 | 26.61 | 122.18 | 187.97 |
| *LCK* | 32.87 | 33.29 | 31.28 | 25.34 |
| *LEFTY2* | 26.79 | 29.41 | 16.14 | 13.64 |
| *ZFP42* | 26.43 | 19.67 | 137.86 | 231.49 |
| *OTX2* | 24.05 | 25.71 | 43.32 | 72.13 |
| *DPPA2* | 23.98 | 22.13 | 23.57 | 0 |
| *IDO1* | 20.11 | 15.16 | 53.78 | 69.5 |
| *HHEX* | 17.25 | 17.04 | 12.57 | 0 |
| *NR5A2* | 13.91 | 16.44 | 7.16 | 0 |
| *DPPA5* | 12.59 | 11.41 | 8.09 | 9.08 |
| *PDGFRA* | 11.67 | 12.01 | 13.97 | 3 |
| *MIXL1* | 10.72 | 11.93 | 2.93 | 6.04 |
| *HEY1* | 9.54 | 11 | 3.81 | 3.92 |
| *TRIM22* | 9.16 | 8.23 | 5.6 | 22.13 |
| *COL2A1* | 8.01 | 10 | 2.96 | 3.62 |
| *MAP2* | 6.51 | 7.93 | 8.46 | 0 |
| *KLF4* | 5.99 | 7 | 5.79 | 0 |
| *FOXA2* | 4.23 | 5.37 | 1.79 | 0 |
| *EOMES* | 3.85 | 4.97 | 3.82 | 0 |
| *DMBX1* | 2.67 | 2.81 | 0.94 | 0 |
| *CXCL5* | 2.31 | 2.4 | 1.52 | 0 |
| *IL6ST* | 1.58 | 1.41 | 0.98 | 0 |
| *TBX3* | 1.49 | 1.92 | 0 | 0 |
| *CPLX2* | 1.47 | 2 | 2.53 | 0 |
| *PAPLN* | 1.42 | 1.26 | 0 | 0 |
| *RGS4* | 1.4 | 2.19 | 1.95 | 3.83 |
| *TFCP2L1* | 1.34 | 1.74 | 0 | 0 |
| *PAX6* | 1.27 | 0.95 | 1.25 | 0 |
| *CLDN1* | 1.22 | 1.73 | 0 | 3.4 |
| *DRD4* | 1.17 | 1.59 | 0 | 0 |
| *OLFM3* | 1.06 | 0.94 | 1.12 | 0 |
| *NPPB* | 0.89 | 0.76 | 0 | 0 |
| *GATA4* | 0.87 | 0.96 | 0 | 0 |
| *TM4SF1* | 0.79 | 0.42 | 2.52 | 0 |
| *FOXP2* | 0.71 | 0.66 | 0 | 0 |
| *KLF5* | 0.68 | 0.81 | 0 | 0 |
| *CDH9* | 0.55 | 0.38 | 0 | 0 |
| *SST* | 0.41 | 0.5 | 0 | 0 |
| *SNAI2* | 0.39 | 0.46 | 2.37 | 0 |
| *ALOX5* | 0.33 | 0.58 | 0 | 0 |
| *T* | 0.31 | 0.27 | 0 | 0 |
| *FGF4* | 0.26 | 0.41 | 0 | 0 |
| *NOS2* | 0.23 | 0.26 | 1.63 | 0 |
| *NKX2-5* | 0.19 | 0.27 | 0 | 0 |
| *MYO3B* | 0.18 | 0.3 | 0 | 0 |

a Markers are ordered from high to low expression values in subpopulation one
