# Supplementary material for: Single-cell RNA-seq of human induced pluripotent stem cells reveals cellular heterogeneity and cell state transitions between subpopulations
Source: HighWire-hosted journal article supplement (doi:10.1101/gr.223925.117), 2018-05-11
Supplement: Supplemental_Table_S8.docx [file Supplemental_Table_S8.docx]

**Supplemental Table S8.** Number of cells expressing known pluripotent and lineage-primed markers across subpopulations

| Gene Symbola | Subpopulation 1b | Subpopulation 2 | Subpopulation 3 | Subpopulation 4 | Total Cells |
| --- | --- | --- | --- | --- | --- |
| *POU5F1* | 8979 (98.9) | 8909 (99.2) | 465 (88.4) | 162 (80.6) | 18515 (98.6) |
| *DNMT3B* | 6412 (70.6) | 6689 (74.5) | 148 (28.1) | 43 (21.4) | 13292 (70.8) |
| *SOX2* | 6159 (67.8) | 6235 (69.5) | 188 (35.7) | 48 (23.9) | 12630 (67.2) |
| *UTF1* | 4579 (50.4) | 4889 (54.5) | 69 (13.1) | 11 (5.5) | 9548 (50.8) |
| *NANOG* | 1722 (19.0) | 1813 (20.2) | 27 (5.1) | 6 (3.0) | 3568 (19.0) |
| *LCK* | 1326 (14.6) | 1297 (14.4) | 32 (6.1) | 8 (4.0) | 2663 (14.2) |
| *OTX2* | 1081 (11.9) | 1042 (11.6) | 37 (7.0) | 18 (9.0) | 2178 (11.6) |
| *HESX1* | 1100 (12.1) | 895 (10.0) | 88 (16.7) | 40 (19.9) | 2123 (11.3) |
| *DPPA2* | 940 (10.3) | 896 (10.0) | 29 (5.5) | 0 (0.0) | 1865 (9.9) |
| *IDO1* | 788 (8.7) | 588 (6.6) | 47 (8.9) | 19 (9.5) | 1442 (7.7) |
| *ZFP42* | 732 (8.1) | 529 (5.9) | 99 (18.8) | 52 (25.9) | 1412 (7.5) |
| *DPPA5* | 531 (5.8) | 476 (5.3) | 9 (1.7) | 3 (1.5) | 1019 (5.4) |
| *TRIM22* | 401 (4.4) | 373 (4.2) | 8 (1.5) | 4 (2.0) | 786 (4.2) |
| *KLF4* | 296 (3.3) | 337 (3.8) | 6 (1.1) | 0 (0.0) | 639 (3.4) |
| *FOXA2* | 218 (2.4) | 250 (2.8) | 3 (0.6) | 0 (0.0) | 471 (2.5) |
| *CXCL5* | 105 (1.2) | 99 (1.1) | 2 (0.4) | 0 (0.0) | 206 (1.1) |
| *TBX3* | 74 (0.8) | 85 (0.9) | 0 (0.0) | 0 (0.0) | 159 (0.8) |
| *TFCP2L1* | 66 (0.7) | 78 (0.9) | 0 (0.0) | 0 (0.0) | 144 (0.8) |
| *KLF5* | 32 (0.4) | 39 (0.4) | 0 (0.0) | 0 (0.0) | 71 (0.4) |

a Genes are ordered from high to low by total cell expressing the gene markers

b For each subpopulation, the absolute cell numbers are shown along with the percentage (%) of the subpopulation expressing that gene in parentheses.
