# Supplementary material for: Single-cell RNA-seq of human induced pluripotent stem cells reveals cellular heterogeneity and cell state transitions between subpopulations
Source: HighWire-hosted journal article supplement (doi:10.1101/gr.223925.117), 2018-05-11
Supplement: Supplemental_Table_S10.docx [file Supplemental_Table_S10.docx]

**Supplemental Table S10.** Functional enrichment analysis of DE genes for cells in subpopulation two compared to cells in the remaining subpopulations

| Reactome Pathway | Total genes in pathway | Genes in geneset | P-value | FDR |
| --- | --- | --- | --- | --- |
| Cyclin A:Cdk2-associated events at S phase entry | 61 | 41 | 1.1 x 10-16 | 1.1 x 10-15 |
| M Phase | 225 | 78 | 1.1 x 10-16 | 1.7 x 10-15 |
| Cell Cycle, Mitotic | 399 | 119 | 1.1 x 10-16 | 1.7 x 10-15 |
| Synthesis of DNA | 96 | 52 | 1.1 x 10-16 | 1.7 x 10-15 |
| Regulation of APC/C activators between G1/S and early anaphase | 77 | 45 | 1.1 x 10-16 | 1.7 x 10-15 |
| Switching of origins to a post-replicative state | 68 | 41 | 1.1 x 10-16 | 1.7 x 10-15 |
| Dectin-1 mediated noncanonical NF-kB signaling | 59 | 38 | 1.1 x 10-16 | 1.7 x 10-15 |
| The citric acid (TCA) cycle and respiratory electron transport | 159 | 80 | 1.1 x 10-16 | 1.7 x 10-15 |
| S Phase | 120 | 59 | 1.1 x 10-16 | 1.7 x 10-15 |
| Cell Cycle Checkpoints | 149 | 63 | 1.1 x 10-16 | 1.7 x 10-15 |
| G1/S Transition | 103 | 55 | 1.1 x 10-16 | 1.7 x 10-15 |
| DNA Replication Pre-Initiation | 82 | 45 | 1.1 x 10-16 | 1.7 x 10-15 |
| Mitotic Metaphase and Anaphase | 163 | 63 | 1.1 x 10-16 | 4.3 x 10-15 |
| Separation of Sister Chromatids | 154 | 59 | 1.1 x 10-16 | 5.9 x 10-14 |
| Metabolism of amino acids and derivatives | 266 | 76 | 1.6 x 10-12 | 1.7 x 10-11 |
| TCF dependent signaling in response to WNT | 158 | 44 | 1.1 x 10-7 | 1.4 x 10-6 |
| Metabolism of nucleotides | 62 | 24 | 5.4 x 10-7 | 4.3 x 10-6 |
